# Supplementary material for: Challenges in EGFRvIII Detection in Head and Neck Squamous Cell Carcinoma
Source: PLoS One. 2015 Feb 6;10(2):e0117781. doi: 10.1371/journal.pone.0117781 (PMC4320077; doi:10.1371/journal.pone.0117781)
Supplement: S1 Table — (XLS) [file pone.0117781.s003.xls]

## Sheet: Sheet1
		Supplemental Table 1. Long range PCR primers and primer sets
	2011-06-07	Ji et al PNAS 2006 vIII in lung
			NT_033968.6
Group	Ji et al name	Primer	Seq start	Seq end	Primer set
ALL		5'-CCCTTCGCACTTCTTACACTTG -3'	4812995	4812974	Exon 8
1	C1	5'-CCTGACTCCGTCCAGTATTGAT-3'	4676283	4676304	A	in exon 1
2	C2	5'-TTCCATAGAGGCAGCTTAGTCC-3'	4679196	4679217	B
3	F1	5'-TGAGCCCCTAGAAAGTAAGTGC-3'	4681254	4681275	C
4	D1	5'-GTTCCCTGCTTAAGACCACATC-3'	4682975	4682996	D
5	F2	5'-CTGAGGACCGACTTACCTTTTG-3'	4684207	4684228	E
6	D2	5'-CCAATGTCAGATGTCATCCACT-3'	4685875	4685896	F
7	C3	5'-CTCCCGTGAATTTTCACTCTCT-3'	4689485	4689506	G
8	D3	5'-AGCCTTTCACAGCATTATTTGG-3'	4693083	4693104	H
9	D4	5'-GTAATTGCCAGAGGTGGAAGTC-3'	4696066	4696087	I
10	C4	5'-GTCTGATTGAACCTTCCCAGAG-3'	4699411	4699432	J
11	D5	5'-AACAAAAGTGGCCTGAAGAGAG-3'	4702575	4702596	A
1	D6	5'-AAGGAGCATGTGAGTGTTGATG-3'	4705939	4705960	B
2	C5	5'-GTTGACACAGTCAAGGAGCAAG-3'	4709778	4709799	C
3	D7	5'-GTATCGCTGTTCTAACGTGCAG-3'	4712437	4712458	D
4	F3	5'-CCTCTTTCCTTGTTTTGGTCAC-3'	4714700	4714721	E
5	D8	5'-GTTTCACACTTGTGGGTGAATG-3'	4716098	4716119	F
6	F4	5'-TATAACGATGCAGTTCCCTGTG-3'	4717799	4717820	G
7	C6	5'-GTGCTTCTGTGAGCATGTTTTC-3'	4719563	4719584	H
8	F5	5'-GGAGTAAGCTTTGCTGGTGACT-3'	4722356	4722377	I
9	D9	5'-ACGTGATGAAAGTACCATGCAG-3'	4723106	4723127	J
10	F6	5'-GTCAGAAGAAACCCTCAAGGTG-3'	4724277	4724298	A
11	D10	5'-GTGATGAGCAAAGACACACTCC-3'	4726700	4726721	B
1	A7	5'-TACCAGCTGTGGGACTTGAGTAAGCTCCTG-3'	4729446	4729475	C
2	F7	5'-CTTGCTCCCCAAATACCTACTG-3'	4731656	4731677	D
3	D11	5'-AGCAACCACTACCACAACAATG-3'	4732516	4732537	E
4	D12	5'-TTGCTGAGACAGAAAGTTCAGG-3'	4735897	4735918	F
5	C8	5'-CTTGGGTCATTCCTGATACCTC-3'	4739290	4739311	G
6	C9	5'-CTTGTTTGTTTCCCTTGTCTCC-3'	4739449	4739470	H
7	F9	5'-GATGCTCTTAGCCATTCATTCC-3'	4741907	4741928	I
8	D13	5'-CCACTTTCTGAAAACTCCTGCT-3'	4742654	4742675	J
9	F10	5'-GAGGTTATTTTGCTCCCTTTCC-3'	4743404	4743425	A
10	D14	5'-CCACTGTCAAGAGTTGTGGAAG-3'	4746058	4746079	B
11	F11	5'-GCTGAGTTGGCAAGTGATAGTG-3'	4748146	4748167	C
1	C10	5'-AGTGCCCTAGAGGATGAGACTG-3'	4749361	4749382	D
2	F12	5'-CCTACTTCCCTTGTCCTTTCCT-3'	4750627	4750648	E
3	D15	5'-CGCCTTTAGAACCACAATTCTC-3'	4752599	4752620	F
4	D16	5'-CGTCCATGTTTTCCCTCTACTC-3'	4756083	4756104	G
5	F13	5'-AACTCTGCTCCTTCTGACAACC-3'	4758152	4758173	H
6	C11	5'-CTACTGGAAAGATTCCCACCTG-3'	4759279	4759300	I
7	F14	5'-GTTGATGACCTTTCCCAGTCTC-3'	4760286	4760307	J
8	D17	5'-TGTTGGCAGAGAGGGAATTACT-3'	4762495	4762516	A
9	D18	5'-ATAGCAGTAGGCTGAAGGCAAG-3'	4765613	4765634	B
10	C12	5'-GACTCACTTTGATAGCCACACG-3'	4769272	4769293	C
11	F15	5'-TAACAAGGAACCTTTGGCTTTG-3'	4771718	4771739	D
1	D19	5'-GTCATACAGTAGCAGGCAGGTG-3'	4772821	4772842	E
2	F16	5'-GGGGTCTGAAGTTTGAAACAAG-3'	4773021	4773042	F
3	F17	5'-ATGCTGGGAAGACTGGAGTTAG-3'	4774960	4774981	G
4	D20	5'-AGATTACAGCCTTGGAACTGGA-3'	4776346	4776367	H
5	F18	5'-CCCAAGAGGGCTAATATGTGAC-3'	4777354	4777375	I
6	C13	5'-CTCACAGATGTGCTGACTCCTC-3'	4779641	4779662	J
7	D21	5'-TGGTTCCAGTCAATGCTATGTC-3'	4783331	4783352	A
8	D22	5'-GAAAGGGCTCCTCATCACATAC-3'	4786909	4786930	B
9	C14	5'-GGCACTTGTAGGCAAGGTAGTC-3'	4789616	4789637	C
10	D23	5'-GAGAAACCCAGGACAAGTCATC-3'	4793494	4793515	D
11	D24	5'-GTTGGGTAATTGGGCATTTAAG-3'	4796730	4796751	E
1	F8	5'-CCCCCACTGAGGAATACTGTAG-3'	4733746	4733767	F
